# Supplementary material for: Accelerating neural network training with distributed asynchronous and selective optimization (DASO)
Source: Springer Nature journal article supplement (doi:10.1186/s40537-021-00556-1), 2022-02-04
Supplement: MOESM1 [file 20102922]

### Proof of Convergence

*Proof* The following proof of DASO's global synchronization method is based heavily on the convergence analysis shown by [43] and will show that the gradients determined with DASO are bounded.

Let  $X \subset \mathbb{R}^n$  be a known set, and  $f : X \rightarrow \mathbb{R}$  a differentiable, convex,  $L$ -smooth, and unknown function. Then, the estimator of the stochastic gradient of  $f(x)$  is a function  $\tilde{g}(x)$  for inputs  $x$  determined by the realization of a random variable  $\zeta$ , such that  $\mathbb{E}[\tilde{g}(x; \zeta)] = \nabla f(x : \zeta)$ . In the following,  $\zeta$  is omitted due to space constraints. The stochastic gradient descent (SGD) algorithm updates a model's state at batch  $t + 1$ ,  $x_{t+1}$ , with the following rule  $x_{t+1} = x_t - \eta \tilde{g}(x_t)$ , where  $\eta$  is the parametric learning rate. A commonly used variant of SGD in practice is minibatching for computational efficiency reasons. In minibatch SGD, the true stochastic gradient is approximated by averaging across  $m$  input items  $x_i$ , i.e.  $\tilde{G}(x_t) = \frac{1}{m} \sum_{i=1}^m \tilde{g}(x_{t,i})$ . The model state  $x_{t+1}$  for minibatch SGD is

$$x_{t+1} = x_t - \eta \tilde{G}(x_t) \quad (3)$$

where  $\tilde{G}(x_t)$  is an estimator of  $\nabla f(x_t)$ .

Let us now consider, that  $S$  subsequent update steps are performed. It is possible to write the model state as:

$$x_{t+S} = x_t - \eta \sum_{i=0}^{S-1} \tilde{G}(x_{t+i}) \quad (4)$$

One of the primary assumptions in SGD is the Lipschitz-continuous objective gradients. This has the effect that:

$$f(x_{t+1}) - f(x_t) \leq -\eta \nabla f(x_t)^T \mathbb{E}[\tilde{g}(x_t)] + \frac{1}{2} \eta^2 L \mathbb{E}[\|\tilde{g}(x_t)\|_2^2] \quad (5)$$

where the Lipschitz constant,  $L$ , is greater than zero. Equation (5) implies that the expected decrease in the objective function,  $f(x)$ , is bounded above by a set quantity, regardless of how the stochastic gradients arrived at  $x_t$  [43].

In DASO, the local synchronization step is bound via the same assumptions as minibatch SGD outlined in [43], so long as the iid assumption is upheld. However, the non-standard global synchronization step used in DASO must be shown to be bound under the same principles. DASO's global synchronization is:

$$x_{t+S}^{\text{DASO}} = \frac{2Sx_{l:t+S-1} + \sum_{i=1}^P x_{p:t}^i}{2S + P} \quad (6)$$

where the  $l$  and  $p$  subscripts represent the node-local and global model states,  $S$  is the number of local update steps before global synchronization, and  $P$  is the number of processes.

Similar to Equation (3), this can also be represented via the locally and globally calculated gradients,  $\tilde{G}_l(x_{l:t})$  and  $\tilde{G}_p(x_{p:t})$  respectively. The global synchronization function in the gradient representation is as follows:

$$x_{t+S}^{\text{DASO}} = x_t - \alpha \left( 2S \sum_{k=0}^{S-1} \tilde{G}_l(x_{l:t+k}) + \sum_{i=1}^P \tilde{G}_p(x_{p:t}^i) \right) \quad (7)$$

where  $\alpha = \eta/(2S + P)$ . Using this, Equation (3), and the fact that the updates between  $t$  and  $S$  are local synchronizations which take the form of Equation (4), we find that globally calculated gradients are as follows.

$$\tilde{G}^{\text{DASO}}(x_{t+S-1}) = P \sum_{\beta=0}^{S-1} \tilde{G}_l(x_{l:t+S-\beta}) - 2S \tilde{G}_l(x_{l:t+S-1}) - \sum_{i=1}^P \tilde{G}_p(x_{p:t}^i) \quad (8)$$

As all gradient elements in Equation (8) are bound under Equation (5),  $\tilde{G}^{\text{DASO}}(x_{t+S-1})$  is similarly bounded.  $\square$
